# Supplementary material for: Metal free MoS2 2D sheets as a peroxidase enzyme and visible-light-induced photocatalyst towards detection and reduction of Cr(vi) ions
Source: Royal Society of Chemistry journal article supplement (doi:10.1039/c8nj03996h), 2018-01-01
Supplement: c8nj03996h1.pdf [file c8nj03996h1.pdf]

## Supplementary Information

### **Metal free MoS<sub>2</sub> 2D sheets as peroxidase enzyme and visible-light-induced photocatalyst towards detection and reduction of Cr(VI) ion**

*Priyakshree Borthakur<sup>a,b</sup>, Purna K. Boruah<sup>a,b</sup>, Manash R. Das<sup>a,b,\*</sup>, Sofya B. Artemkina<sup>c\*</sup>, Pavel A. Poltarak<sup>c,d</sup>, Vladimir E. Fedorov<sup>c,d</sup>*

*<sup>a</sup>Materials Sciences and Technology Division, CSIR-North East Institute of Science and Technology, Jorhat 785006, Assam, India*

*<sup>b</sup>Academy of Scientific and Innovative Research, CSIR-NEIST Campus, India*

*<sup>c</sup>Nikolaev Institute of Inorganic Chemistry SB RAS, Novosibirsk 630090, Russia*

*<sup>d</sup>Novosibirsk State University, Department of Natural Sciences, Novosibirsk 630090, Russia*

\*To whom correspondence should be addressed

**Dr. Manash R. Das**

Materials Sciences & Technology Division,

CSIR–North East Institute of Science and Technology, Jorhat–785006, Assam, India

Tel: +91- 9957178399,

E-Mail: [mnsrds@yahoo.com](mailto:mnsrds@yahoo.com), [mrdas@neist.res.in](mailto:mrdas@neist.res.in)

**Dr. Sofya B. Artemkina**

Nikolaev Institute of Inorganic Chemistry SB RAS, Novosibirsk 630090, Russia

Novosibirsk State University, Novosibirsk, Russia

E-mail: [artem@niic.nsc.ru](mailto:artem@niic.nsc.ru)

## 29 1 Characterization

30 The crystallinity of the synthesized MoS<sub>2</sub> sheets was investigated by analyzing the X-ray  
31 diffraction (XRD) analysis using Rigaku X-ray diffractometer (model: ULTIMA IV, Rigaku,  
32 Japan) with the scanning rate 3° min<sup>-1</sup> at 2θ value 5-90° with Cu-Kα X-ray radiation ( λ=  
33 1.54056 Å) at generator voltage and current of 40 kV and 40 mA, respectively. Fourier  
34 Transform infrared (FTIR) spectrum was recorded on IR affinity, Shimadzu, Japan equipped  
35 with Shimadzu DRS-8000 DRIFT accessory and IR solution software with a spectral resolution  
36 of 4 cm<sup>-1</sup>. Raman spectra were recorded with a SPEX Triplemate instrument at wavelength  
37 488nm. The dispersion was carried out with ultrasonic bath Saphir (150 W, 35 kHz). The colloid  
38 dispersion was centrifuged with Eppendorf Centrifuge 5430 equipped with F-35-6-30 rotor. The  
39 morphology and the elemental analysis of the synthesized MoS<sub>2</sub> sheets were analysed by  
40 FESEM using ZEISS Gemini scanning electron microscope (Germany) operated at an  
41 accelerating voltage of 9-7 kV. The TEM and HRTEM analysis were carried out using JEOL  
42 JEM-2100 Plus, Japan operated at an accelerating voltage 200 kV. The chemical composition of  
43 the synthesized MoS<sub>2</sub> sheets was analysed by X-ray photoelectron spectroscopy (XPS)  
44 measurements using a Thermo-Scientific ESCALAB Xi<sup>+</sup> spectrometer with a monochromatic Al  
45 Kα X-ray source (1486.6 eV) and a spherical energy analyzer that operates in the CAE (constant  
46 analyzer energy) mode using the electromagnetic lens mode. The CAE for survey spectra is 100  
47 eV and that for high-resolution spectra is 50 eV. The catalytic oxidation of TMB and  
48 colorimetric detection of Cr(VI) ions were examined using a UV–vis spectrophotometer (MS-11-  
49 UV-1800, Shimadzu, Japan). The fluorescence spectra were recorded using Fluorescence  
50 Spectrophotometer (Horiba Fluorolog®-3).

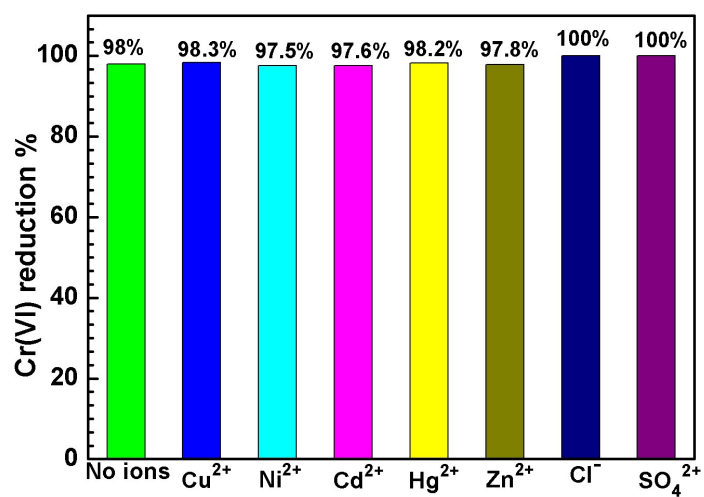

**Fig. S1.** Photocatalytic reduction of Cr(VI) in presence of different inorganic ions
